# Supplementary material
Source: MDPI journal article supplement (https://www.mdpi.com/2076-3263/3/4/633)
Supplement: s1 [file s1]

## Sheet: Lavas and Domes
New whole rock major and trace element data for Uturuncu lavas and domes.
	DM05A	DM10A	DM15A	DM28A	DM29A	DM37A	DM46A	DM52A	DM58A2	DM60A2	DM63A2	DM66A2	DM69A2	DM73A2	DM90	DM93A2	DM101A2	M106A1	M108A2	M112A2	GSM10	GSM13	GSM14	GSM15	GSM16	GSM17	GSM18	GSM20	GSM21	GSM22	GSM23	GSM24	GSM26	GSM28	GSM29	GSM-49	GSM-50	GSM-53	GSM60	GSM64	GSM69	GSM-70
SiO2	66.3466	65.5546	64.9544	63.327	62.7572	65.11	64.7053	64.2689	62.3049	62.3873	61.9462	62.5131	63.4808	63.0363	62.4486	63.8538	65.6085	64.7314	63.2019	64.5423	65.5337	67.0686	66.1029	64.245	66.2401	66.5852	66.1415	65.589	66.2629	65.0005	64.7797	64.6247	64.6385	63.5243	63.648	64.1533	64.8369	65.0049	63.2435	63.2579	65.4793	67.1086
TiO2	1.00937	1.07876	1.10698	1.1626	1.01731	1.151	1.03591	1.05271	1.13491	1.15071	1.141	1.17039	1.1699	1.1718	1.29078	1.17791	1.20542	1.18382	1.06093	1.14919	1.22125	0.891444	1.1754	1.14149	0.849704	0.997539	1.10362	1.11713	1.05479	1.12485	1.1538	1.17354	1.09802	1.01212	0.990062	1.08889	1.0822	1.06389	1.15464	1.06757	1.11618	0.953426
Al2O3	16.3353	16.162	16.4774	17.2599	16.1101	16.13	16.2052	15.9818	17.193	17.113	17.3124	17.3467	16.6831	17.098	15.5301	16.731	15.9041	16.4046	16.167	16.2097	16.1033	16.0111	15.8894	16.7624	16.2714	15.8449	15.8976	16.0606	15.8774	16.2425	16.422	16.4852	16.3983	15.9722	16.1066	16.3691	16.2537	16.2646	16.8564	16.6315	16.3114	15.9394
FeO*	4.11669	4.80901	5.05397	5.28965	5.54022	4.82	4.80167	4.9971	5.7305	5.74017	5.74864	5.58409	5.42758	5.56501	5.23069	5.35805	4.84815	4.95962	5.35694	5.20959	4.70769	4.10293	4.64586	5.25876	4.58122	4.4667	4.44288	4.58942	4.33562	5.0983	4.97217	5.05708	5.08012	5.26216	5.24007	4.79037	4.93264	4.90604	5.71978	5.29235	4.51105	3.99262
MnO	0.0518442	0.0655197	0.0703217	0.0757838	0.084579	0.058	0.0701385	0.0693741	0.0865885	0.0894887	0.0923777	0.0834455	0.079331	0.0806212	0.0777129	0.0812567	0.0584452	0.0598809	0.0745494	0.067706	0.0614694	0.0518603	0.0574102	0.0680059	0.0654055	0.055001	0.0549655	0.054142	0.0517314	0.0658397	0.0589859	0.0708673	0.0702248	0.0797878	0.0716197	0.0672686	0.0668699	0.0636856	0.0827184	0.0791349	0.0555075	0.0505206
MgO	1.56071	1.87284	2.00654	2.26963	3.4206	2.02	2.21089	2.731	2.59606	2.60144	2.66517	2.56236	2.39284	2.45619	3.56791	2.32038	1.8513	2.05418	3.1368	2.18104	1.89879	1.40134	1.7279	1.9492	1.41255	1.61403	1.72251	1.76883	1.63795	1.86138	1.99711	2.18646	2.06466	3.14723	3.074	2.29719	2.10674	2.01914	2.44751	2.3952	1.90592	1.46387
CaO	3.70091	4.13826	4.18536	4.65051	4.99233	4.18	4.47076	4.37766	4.95007	4.89842	5.12957	4.82045	4.62712	4.62981	4.71989	4.43289	4.13975	4.1353	4.66307	4.40644	4.16141	3.75852	3.95162	4.27346	3.65584	3.6373	3.72435	3.98357	3.81644	4.04767	4.00269	4.32688	4.34347	4.7072	4.68854	4.44174	4.11176	4.02178	4.56232	5.00613	3.97342	3.4015
Na2O	2.26486	2.36999	2.30133	2.15163	2.22464	2.46	2.35847	2.23213	2.21106	2.20447	2.21309	2.08055	2.12723	2.06613	2.57741	2.15556	2.28378	2.37038	2.27901	2.42721	2.10585	2.4024	2.29366	2.34125	2.63721	2.41464	2.42076	2.41511	2.41338	2.46147	2.39817	2.07149	2.29513	2.24739	2.23119	2.4774	2.28554	2.30304	2.17845	2.38272	2.41883	2.36247
K2O	4.31992	3.70013	3.59417	3.54401	3.57624	3.77	3.86232	3.99638	3.49083	3.50981	3.44765	3.5545	3.71973	3.61165	4.11912	3.60118	3.79396	3.794	3.77229	3.53553	3.90945	4.09815	3.8701	3.65617	4.0708	4.1061	4.1673	4.09796	4.23228	3.81416	3.90543	3.72451	3.73787	3.76643	3.67421	3.95222	4.00753	4.04133	3.47414	3.61276	3.93141	4.4382
P2O5	0.293846	0.248843	0.249485	0.269317	0.27682	0.302	0.279341	0.292959	0.302041	0.305289	0.303962	0.284347	0.29238	0.284446	0.437797	0.287973	0.306665	0.306819	0.287535	0.271335	0.297067	0.213733	0.285779	0.304269	0.215722	0.278555	0.324492	0.324214	0.31754	0.283365	0.309884	0.279312	0.273679	0.281169	0.275678	0.36248	0.316099	0.311584	0.280529	0.274677	0.29702	0.289463
LOI (%)	2.29288	0.988419	1.46223	0.65461	0.419874		1.10967	0.98911	0.429442	0.861234	0.97107	1.62516	1.27638	1.46736	0.315457	1.34779	0	1.27262	1.25988	0.365547	0.845319	1.53695	0.300388	1.65421	0.658877	0.53093	0.360419	1.29282	1.59537	0.931877	1.15328	0.662055	0.0620347	1.00101	0.505005	1.23866	0.953543	0.166713	0.9177	1.00551	1.70638	1.42957
Total	100	100	100	100	100	100	100	100	100	100	100	100	100	100	100	100	100	100	100	100	100	100	100	100	100	100	100	100	100	100	100	100	100	100	100	100	100	100	100	100	100	100
Ni	4.8	6.2	5.5	5.5	4.7	5.3	3.5	5.7	6	3.2	4.9	4.1	6.2	6.2	26.1	5.7	11.1	6.2	4.4	5.9	5.2	4.2	4.4	4.3	3.8	4.8	4.8	3.4	3.7	5.5	5.2	5	4.3	3.3	5.3	6	5	6.1	5.3	5.7	4.7	6
Cr	10.1	12.4	12.5	13.9	84.2	14.3	16.7	47.9	10.5	11.4	8.7	16.1	11.7	13.1	118.9	10.6	21.3	15.4	69.9	17.7	12.8	9.5	12.3	10.4	15.8	11.3	9.8	10.3	10.6	9.9	14.7	14.3	11.9	73.4	75.7	20.1	12	10.7	12.4	13.8	14.7	9.2
V	98.2	118.3	125.1	138.1	141.5	131	130.8	127.8	165.8	162.6	165.7	145.1	140.9	142	153.8	143.5	126.5	135.1	134.9	140.8	130.4	83.1	118.5	137.8	93.9	110.3	118.6	119.2	111.1	137.2	128.3	131.3	131.9	135.1	135.4	126.6	139.5	140.8	133.4	146.4	120.4	95.1
Ga	23.4	22.4	21.3	24.2	20.9	24.4	21.4	22.4	21.5	21.5	21.2	22.3	20.2	21.8	23.6	21.7	21.8	23.5	23	22.6	23.3	23.2	21.9	22.5	22.1	22.6	23.6	23.5	22.3	22	23.2	22.5	21.9	20.5	19.9	21.2	21.9	23.1	22.5	21.9	22	22.6
Cu	3.1	5.1	7.7	4.4	4.7	5.9	4.9	5	5.6	3.3	3.8	3.3	4.7	4.9	16.9	5	8.5	6.1	6.1	7.7	3.9	4.6	5.1	5.4	5	5.8	4.6	3.7	5.6	7	5.9	4.8	4.1	4.7	6.4	7.2	5.4	6.7	6	4.8	3.5	4.3
Zn	120	103.9	104.7	114.2	109.2	119.8	112.8	113.3	113.7	113.9	113.4	110.7	111.7	112.8	110.4	111.4	116.8	125.7	111.9	107.3	115.5	104.7	111.2	118.9	96	116.6	117.6	120.8	117.1	120.1	122.9	114.1	108.1	111.6	101	112.5	114.7	114.9	111.1	107.9	124.4	116.2
As	6.2	6.6	10.2	4.5	7	6.7	6	3.7	5.4	4.1	7.8	7.6	5	7.5	5	6	9.3	8.3	4.5	11.5	4.6	6.3	8.4	12	7.3	7.9	6.9	4.5	5.3	6	7.3	8	5.8	7.2	9.4	6.2	8.2	6	9.6	5.1	4.8	8.4
La	74.7629	53.1829	53.1974	63.2561	58.6077	67.0749	62.1477	65.8109	58.5032	59.562	57.7769	60.8075	58.9394	66.8821	73.4138	59.8341	62.4217	68.0966	63.0342	55.4313	63.8078	47.2205	62.1182	66.0585	40.7698	68.9268	76.8509	75.9875	76.7222	67.413	70.9386	59.2496	59.4682	61.3128	61.0182	79.1384	70.0191	70.0562	58.1218	58.1082	67.4176	73.2094
Ce	148.788	108.681	109.483	126.919	117.364	135.812	125.001	132.479	118.343	120.099	116.185	121.665	118.569	138.06	147.906	121.46	129.395	138.725	130.522	119.69	131.584	94.1465	128.547	138.762	83.9161	139.788	153.482	152.276	153.042	137.368	141.712	120.531	120.255	122.298	119.612	154.359	141.179	141.757	116.772	117.836	136.301	148
Pr	17.6277	13.0536	13.0226	15.1697	13.7785	16.1039	14.8339	15.5344	13.9586	14.2281	13.8424	14.672	14.1898	16.6196	17.5791	14.4996	15.6544	16.451	14.8895	13.9422	15.7972	11.159	15.2258	16.5931	10.0194	16.6086	18.3086	18.0601	18.063	16.7295	16.8175	14.4283	14.2918	14.4386	14.5601	17.8031	16.6941	16.8631	13.9514	13.9328	16.0417	17.2918
Nd	64.8951	49.515	49.2942	56.9949	51.4216	59.8091	55.5211	58.1927	52.6696	53.4838	52.0435	55.7807	53.6145	62.3196	65.1273	54.8276	59.3318	61.6602	55.3444	52.7733	59.4253	42.0411	57.5845	62.2184	38.2716	61.4622	67.899	66.7206	66.5547	62.9275	62.9605	54.855	53.5767	53.8907	54.2951	65.5251	62.1127	63.0732	53.3794	52.7013	59.5164	63.8221
Sm	11.8199	9.64306	9.68984	10.8446	9.87052	11.1444	10.6498	10.9498	10.1872	10.3288	10.1072	10.8217	10.5092	11.5036	11.9095	10.8013	11.4148	11.3608	10.3728	10.0143	11.401	8.58095	11.0798	11.5368	8.1063	11.3859	12.1376	11.9626	11.9166	11.4282	11.5491	10.5942	10.3963	10.2623	10.2675	11.7093	11.4218	11.6064	10.5716	10.0341	10.9925	11.6899
Eu	2.02836	1.80278	1.88145	2.09836	1.87785	1.95301	1.90895	1.9068	1.98023	1.98817	1.99771	2.05792	1.98063	1.87874	2.12013	1.9904	2.04218	1.97697	1.85501	1.83146	2.0605	1.66092	2.01179	1.96135	1.50663	1.89427	2.07729	2.08647	2.02794	1.88319	2.00863	2.04023	1.90281	1.84815	1.89597	2.12573	1.96538	1.99924	2.0049	1.89654	1.94396	1.9066
Gd	8.24142	7.67712	7.77545	8.36271	7.49239	7.83608	7.83256	7.95826	8.23453	8.24324	8.28509	8.56131	8.27111	7.94981	8.52817	8.59083	8.48237	7.9747	7.5109	7.54583	8.3455	6.63797	8.25419	7.97739	6.56737	8.09609	8.36716	8.05992	8.08528	8.16456	8.21513	8.31789	7.97954	7.56851	7.79039	8.44165	8.3628	8.55768	8.44677	7.66104	7.74964	8.09961
Tb	1.08435	1.10814	1.16455	1.21803	1.06706	1.04977	1.08534	1.11138	1.24944	1.2307	1.27042	1.25821	1.22794	1.10835	1.1522	1.28726	1.17293	1.07176	1.04097	1.08307	1.16594	0.916468	1.15363	1.09932	0.986752	1.10964	1.09877	1.04708	1.05814	1.11414	1.09235	1.20699	1.16658	1.05422	1.10033	1.14389	1.1754	1.20126	1.26968	1.11989	1.0357	1.07024
Dy	5.26418	5.88534	6.22052	6.50282	5.75395	5.12258	5.70024	5.65951	6.95964	7.02678	7.1512	6.90211	6.74725	5.59461	5.72244	7.18018	5.96462	5.20207	5.43139	5.7109	5.8635	4.53784	5.826	5.68428	5.4439	5.65139	5.26184	5.03429	4.98137	5.61966	5.23768	6.18013	6.19084	5.54496	5.74292	5.76282	6.06868	6.08613	6.9362	5.98353	5.00322	5.14701
Ho	0.83619	1.03473	1.11258	1.14577	1.04921	0.817875	1.0085	0.986434	1.30861	1.29319	1.37208	1.24984	1.22368	0.941678	0.969297	1.31359	0.993266	0.841739	0.95562	0.999571	0.97221	0.751274	0.96463	0.981057	0.946692	0.933008	0.826559	0.798213	0.778235	0.965372	0.853725	1.07397	1.10135	1.00063	1.0302	1.00475	1.03751	1.05586	1.29791	1.08236	0.81392	0.808667
Er	1.83681	2.44268	2.70058	2.84187	2.65858	1.86254	2.47859	2.3986	3.28779	3.30593	3.45808	3.13317	3.03462	2.23751	2.34419	3.29768	2.28393	1.88695	2.29328	2.32336	2.22452	1.76445	2.17744	2.32918	2.36518	2.18432	1.84029	1.72941	1.73293	2.28937	1.90913	2.52045	2.70277	2.47617	2.63222	2.41654	2.40251	2.45503	3.23765	2.73599	1.83373	1.80707
Tm	0.23552	0.326516	0.366312	0.38377	0.377236	0.2331	0.333343	0.321702	0.453623	0.45746	0.484214	0.429483	0.409186	0.295874	0.310317	0.444369	0.292682	0.236283	0.315631	0.31101	0.285292	0.240429	0.286345	0.31223	0.334427	0.286516	0.230718	0.218516	0.212037	0.299038	0.241718	0.324476	0.366004	0.344795	0.367652	0.324027	0.307485	0.31195	0.435961	0.385859	0.230265	0.22826
Yb	1.33402	1.89881	2.15008	2.27042	2.33916	1.34891	2.00979	1.94067	2.7248	2.7017	2.8721	2.54187	2.46067	1.70626	1.8427	2.64241	1.66053	1.38553	1.88959	1.82614	1.61241	1.40718	1.6039	1.80556	1.97319	1.63718	1.29866	1.25085	1.21255	1.76195	1.40795	1.85322	2.12635	2.10104	2.24705	1.89365	1.76345	1.76043	2.64546	2.32255	1.3258	1.31494
Lu	0.180242	0.269686	0.30969	0.326004	0.356171	0.188503	0.294188	0.284716	0.403797	0.405644	0.431562	0.371442	0.365347	0.243873	0.269352	0.389582	0.233104	0.188789	0.283592	0.273441	0.228286	0.203247	0.224608	0.260579	0.288827	0.235018	0.17088	0.16851	0.168108	0.253567	0.197263	0.262182	0.301359	0.328947	0.333384	0.275533	0.247107	0.241308	0.393554	0.349511	0.183275	0.174338
Ba	900.739	686.457	699.36	870.463	808.645	859.462	808.629	855.43	776.065	777.483	762.457	788.99	775.283	784.484	975.213	805.795	806.521	903.706	820.965	693.17	830.525	730.877	791.441	764.852	640.73	850.312	977.317	954.162	941.794	809.099	900.058	799.763	785.2	826.047	814.128	941.787	865.889	868.233	817.917	784.462	857.332	880.579
Th	26.5825	19.4166	18.9754	21.446	19.5689	22.2498	20.8485	22.5408	18.6999	19.3105	18.4095	20.0222	19.459	24.7202	24.5301	19.4922	21.8764	22.9782	21.5404	20.2509	22.579	14.8126	21.7797	24.4228	14.3374	24.8485	25.7255	25.7475	26.5517	24.5001	24.1302	19.5086	20.5624	20.9935	20.3819	25.1569	24.9147	24.8194	18.9178	19.0937	22.8085	27.4148
Nb	21.0547	18.2371	18.2226	20.6791	18.712	20.3116	18.8754	20.1646	20.8219	21.0401	20.6538	20.6815	20.4268	18.3734	35.4198	20.4365	22.1419	20.8329	19.9548	18.103	22.7378	15.8149	21.727	18.579	15.7871	19.1711	20.4035	20.2624	19.7656	18.2895	21.126	20.5098	19.9338	19.2414	18.7214	26.4575	22.1492	22.0118	19.9974	18.3517	19.8967	20.8642
Y	21.2219	26.5452	28.7848	28.8034	26.4586	21.2219	26.2656	25.5942	33.2839	33.5209	34.8701	32.3152	31.5132	24.3665	24.8876	33.7752	25.7484	21.413	24.3221	25.3508	24.9562	20.3252	25.0013	24.9397	25.7788	24.8476	21.8168	20.445	20.1532	25.6679	21.9677	28.0114	28.5969	25.8702	27.0147	25.9405	26.6902	27.6077	33.2178	28.2452	20.7855	21.0511
Hf	7.45469	6.61176	6.63857	7.17323	6.45676	7.24276	6.77084	6.92519	6.36353	6.38538	6.18429	7.07454	6.86864	7.43693	7.40324	6.82596	7.3073	7.42072	6.70066	6.69469	7.3472	5.9901	7.07877	7.51331	5.26914	7.26074	7.76421	7.77532	7.64243	7.34254	7.51204	7.11278	6.69099	6.47226	6.35545	7.06524	7.33211	7.18273	6.69825	6.57128	7.22927	7.26903
Ta	1.53124	1.43494	1.4119	1.47407	1.33673	1.38074	1.3269	1.43644	1.46111	1.46766	1.45475	1.45005	1.43469	1.31703	2.44339	1.42568	1.56044	1.41377	1.42235	1.31732	1.57934	1.44548	1.53964	1.2919	1.51447	1.4125	1.40648	1.38257	1.3855	1.26929	1.4514	1.40378	1.41544	1.37256	1.33945	1.63567	1.52138	1.50575	1.3958	1.29732	1.38207	1.55431
U	4.76321	4.38191	4.1813	3.72269	3.89998	4.02959	4.02006	4.45181	3.67223	3.82393	3.7073	3.71924	3.6579	4.48541	4.29972	3.55165	3.88288	4.00034	4.22377	3.72818	3.89443	5.50306	3.9616	4.27345	5.2298	4.91158	4.69173	4.53895	4.79958	4.38154	4.3203	3.38254	4.02915	4.23947	4.10923	4.74879	4.46555	4.50452	3.48208	3.78085	4.51516	5.18247
Pb	26.8227	20.9478	20.5613	21.69	18.6911	21.4213	20.7898	22.3512	20.3576	20.4328	19.8782	20.6373	20.0786	23.4449	21.8934	20.2397	21.6708	22.0371	21.6692	19.4115	22.1767	25.7942	21.7886	22.7683	25.253	24.8729	24.2516	24.0365	24.2464	22.4622	23.1601	20.1446	20.6802	20.6266	19.1147	21.5942	22.7189	23.0435	19.5124	20.6853	22.2927	27.0456
Rb	196.908	166.554	158.69	130.929	154.308	166.854	174.35	176.878	145.502	149.302	142.93	145.213	155.724	177.048	195.805	151.348	170.853	161.82	167.758	162.125	163.39	177.899	174.731	163.265	195.575	193.024	179.135	183.116	189.214	178.951	167.25	153.672	168.928	168.665	160.752	180.828	183.976	188.723	138.405	152.696	174.549	215.682
Cs	8.29143	7.94306	7.39341	4.28741	5.62943	5.4303	5.05822	6.47565	5.20249	5.39542	5.36837	5.63062	5.6181	6.27601	6.26141	5.30088	5.15607	5.70443	6.50792	5.29688	5.26041	12.8004	4.92258	5.7066	9.95403	5.08945	5.1085	5.94591	6.75476	5.38296	5.89552	4.6821	4.39916	6.57271	4.67982	6.53074	6.35068	5.43759	3.5666	5.40113	5.90454	8.98227
Sr	398.404	304.644	309.439	417.246	420.28	394.537	371.403	383.904	474.189	476.069	497.623	415.729	380.131	324.67	501.128	371.226	359.868	380.577	388.507	330.696	357.66	250.522	339.521	341.913	209.302	337.568	396.99	402.736	393.651	327.289	384.176	376.175	369.926	386.564	391.217	503.321	388.185	397.828	383.178	387.745	382.46	349.103
Sc	7.8958	10.8384	12.4515	13.309	18.9364	9.20205	13.9254	14.1298	16.1611	16.5252	16.8465	15.5017	14.6294	8.59871	15.0596	14.6723	9.96394	9.03102	15.4335	12.0024	9.93862	7.59589	9.91214	12.1362	11.0292	9.53089	8.47707	8.48507	8.1916	11.796	9.44349	11.453	13.1532	17.4582	18.4032	12.0585	10.771	10.651	15.5043	16.1171	8.64007	7.52922
Zr	280.058	249.764	247.41	270.977	239.991	273.585	258.35	260.254	241.062	242.331	231.364	269.083	259.527	266.044	280.768	260.191	276.959	280.069	243.096	240.995	278.563	209.968	268.886	288.797	184.573	276.554	294.2	292.91	287.472	278.179	280.541	266.842	252.666	239.209	230.421	266.664	276.382	274.003	248.115	241.1	273.582	275.223
87Sr/86Sr		0.71457	0.714317	0.712956	0.71127	0.713019		0.712358	0.711294	0.711207				0.712738	0.710088		0.7143			0.713576	0.714343	0.715303	0.714519	0.713687	0.71653	0.71385	0.713551	0.713106	0.713125	0.713692	0.712928	0.713649		0.711591	0.711409	0.711002	0.712468		0.712446		0.713075
144Nd/143Nd		0.512148		0.512246					0.512179					0.512159			0.512172				0.512189		0.512163			0.512135	0.512164			0.512202	0.512212	0.51215			0.512227	0.512247	0.512163		0.512227
208/204Pb		18.8731		18.8567	18.8605			18.841	18.863					18.8552			18.8587			18.8924	18.8558	18.8232	18.8624		18.8264			18.8552		18.8652		18.8565		18.8478		18.8741	18.8619		18.8554		18.8605	18.8555
207/204Pb		15.6552		15.6516	15.6518			15.6501	15.6529					15.6515			15.6538			15.6537	15.6529	15.6517	15.654		15.6555			15.6549		15.6505		15.6526		15.6519		15.6518	15.6469		15.652		15.651	15.6527
206/204Pb		38.9429		38.9255	38.9203			38.9207	38.9457					38.9236			38.9322			38.9681	38.9298	38.8752	38.9354		38.9068			38.9576		38.9307		38.9222		38.9178		38.9523	38.9303		38.9227		38.9437	38.9554
δ18O-QTZ		7.2622				9.68132	6.95341		8.94716		7.71063		7.62253		8.92662	9.7509	7.1012		9.1114			8.4456			10.978		9.53115	10.3024	8.62726	8.89416					7.5954	9.7293	7.98443	9.3773			9.95405	6.61885
δ18O-PLG					9.09902	9.56672	10.4011		9.32306	7.56869	7.65406	8.31887	7.59305			8.61905	8.53231	8.76294	8.74191		8.08159		8.80789				10.1971			8.58182		7.54364	7.20659			9.40052	8.75246					9.15167
FeO*= Total Fe

## Sheet: Inclusions
Uturuncu		UTU 13N	UTU 17N	UTU 28X	UTU 28N1	UTU 28N	UTU28N2	UTU 28N3	UTU 53N1	UTU 56N	UTU 56N3	UTU 57N5	UTU 58N1	UTU 69N3	UTU 74N6	UTDM009-B
		Inclusion	Inclusion	Xenolith	Inclusion	Inclusion	Inclusion	Inclusion	Inclusion	Inclusion	Xenolith	Inclusion	Inclusion	Inclusion	Inclusion	Inclusion
																Older Volcanic Material
Majors (wt%)	SiO2	53.9671	56.615	78.6186	59.7063	61.2543	62.2042	58.5689	64.074	58.8561	78.5729	58.9176	57.0756	63.7217	58.7699	64.7554
	TiO2	1.20194	1.27541	0.28806	1.06375	0.98717	0.98386	1.08281	1.05181	1.1905	0.34476	1.17759	1.27024	1.06659	1.06422	0.70931
	Al2O3	15.592	16.8072	9.99547	16.4102	15.574	15.4985	16.2604	15.9839	17.2375	8.61821	16.9587	18.2842	15.8121	16.7214	15.4373
	FeO*	7.35305	7.61616	1.45796	6.42899	5.43842	5.26166	6.78462	4.90799	6.62144	3.66186	6.19849	6.88983	4.41017	5.91178	3.69554
	MnO	0.10819	0.09952	0.02234	0.09913	0.08079	0.07789	0.10524	0.0658	0.10847	0.12152	0.09841	0.11185	0.05293	0.09804	0.04727
	MgO	5.53878	2.3057	0.45613	4.32624	3.25915	3.09973	4.71076	2.04832	3.4785	2.2387	2.91104	3.49041	1.82872	2.98986	1.5093
	CaO	7.55232	5.09767	3.91283	5.19025	4.75307	4.64175	5.26815	3.99421	5.61472	4.20717	5.59667	6.03438	3.94031	6.07076	3.54533
	Na2O	2.24717	2.20266	1.27642	1.98518	2.11639	2.19557	1.91214	2.25485	1.93256	0.43633	2.00287	1.94703	2.36103	2.26745	2.50659
	K2O	1.7936	2.24391	0.93786	3.09037	3.5709	3.67139	2.97349	3.95243	2.8697	0.31561	2.94603	2.52948	3.79882	2.88839	3.99723
	P2O5	0.19817	0.23281	0.06733	0.26058	0.26775	0.27014	0.25658	0.30446	0.2851	0.06528	0.28465	0.27954	0.2856	0.25546	0.19193
	Sum	95.5523	94.496	97.033	98.5609	97.3019	97.9047	97.9232	98.6377	98.1946	98.5824	97.0921	97.9126	97.278	97.0372	96.3952
Trace Element
	Ni	63.8	34.3	3.3	7	7.1	6.2	7.7	6.9	6.2	19.5	5.5	5.8	4.9	5.5	5.9
	Cr	309.1	283.9	9.9	122.2	80.3	74.1	134.9	12.2	20.4	19.5	14.1	15.9	14.6	15.6	20.8
	V	187	98.2	34.2	164.5	129.2	127.7	139.3	139.2	175.6	55.5	166.3	187.6	118.8	179.2	84.2
	Ga	18.6	21.8	13.3	20	20	20.2	20.4	21.5	20.1	10.8	19.8	22	22.7	20.7	23.8
	Cu	17.1	9.8	3.9	6.1	4.5	5.7	9.4	6.6	3	11	6.1	2.6	2.5	4.5	5.4
	Zn	122	107.6	48.1	99.5	108.2	109	105.3	111.1	110.2	129.3	115.8	116.8	123.4	103	96.9
	As	13.7	26.8	16.1	12.5	6.7	4.1	6.9	3.6	2.1	12	13.7	3.8	5.3	14	11.7
	La	29.5534	37.2962	36.54	57.1645			49.8159		45.6183	26.2523		49.0863	63.0575	43.4106	41.3115
	Ce	51.9785	64.0228	79.2687	113.163			98.0288		91.5237	56.0516		98.2131	130.97	87.5133	84.7522
	Pr	7.49659	8.61848	10.0975	13.469			11.92		11.1308	7.30943		12.1139	15.0069	10.6704	10.2399
	Nd	29.7078	32.9002	38.6964	50.0575			45.5032		43.2632	27.6355		46.753	55.6382	40.4512	37.6069
	Sm	6.6204	6.7993	8.05669	9.60144			8.92258		8.76971	6.76878		9.65496	10.3764	8.13004	7.35829
	Eu	1.52212	1.85583	1.38226	1.78358			1.87051		1.91618	0.914253		2.07313	1.85221	1.63654	1.31989
	Gd	6.20629	6.0004	5.85134	7.25297			7.61354		8.006	6.10486		8.58563	7.3247	6.74386	5.35129
	Tb	0.972097	0.905273	0.839012	1.02957			1.12185		1.29667	1.12832		1.38975	0.977863	1.04572	0.743932
	Dy	5.55401	5.02136	4.20791	5.41381			6.30488		7.85454	6.98389		8.30232	4.80357	6.02349	3.75545
	Ho	1.07584	0.925541	0.71127	0.998403			1.22152		1.57813	1.42879		1.67274	0.788322	1.19761	0.635298
	Er	2.6899	2.25593	1.63073	2.49714			3.19649		4.17755	3.89602		4.40736	1.71818	3.18712	1.50601
	Tm	0.371508	0.325014	0.211356	0.356424			0.460898		0.599781	0.591183		0.618367	0.22631	0.458167	0.21058
	Yb	2.26197	1.9762	1.20971	2.15694			2.83152		3.6788	3.70342		3.78589	1.27581	2.87961	1.25019
	Lu	0.340487	0.307198	0.171792	0.330476			0.436717		0.555582	0.553627		0.586191	0.177302	0.451735	0.187389
	Ba	738.817	525.288	188.88	786.169			744.977		700.877	126.071		687.189	825.402	796.262	562.819
	Th	7.17496	9.45873	14.4051	20.616			14.1805		13.4491	12.5065		14.6645	22.9603	14.671	19.8937
	Nb	14.1309	16.2748	9.63369	17.6875			16.6025		18.0769	9.68956		19.3787	18.5602	14.6212	11.4086
	Y	27.6264	24.3624	17.4004	25.3722			31.8176		40.2512	37.2652		41.9518	19.7775	30.5618	16.6125
	Hf	4.05753	4.89025	3.12901	6.24106			5.47683		5.99211	4.29884		6.37742	6.962	5.6689	5.01638
	Ta	1.06695	1.22405	1.12085	1.28983			1.10753		1.19311	1.1243		1.29316	1.2906	1.06821	1.12193
	U	3.06751	3.41859	3.47975	4.06476			2.58617		2.25834	5.62742		2.29973	4.44111	2.97638	6.68415
	Pb	10.1198	9.98284	12.0743	18.4785			14.8116		15.2996	4.30784		16.2803	22.185	17.563	24.6985
	Rb	63.5488	90.6539	42.298	157.686			109.238		105.946	14.3395		91.0574	170.384	118.187	216.291
	Cs	4.49166	6.12233	1.91292	6.07626			2.68245		2.43584	0.547778		2.797	5.89133	4.80702	13.4926
	Sr	341.443	260.4	294.145	398.704			420.726		447.54	198.671		485.499	392.62	427.283	226.09
	Sc	23.0291	20.2825	5.69835	17.3635			25.7496		21.4721	6.43178		22.4276	7.54959	21.6024	7.17981
	Zr	150.734	179.728	110.503	227.61			201.508		220.564	148.973		237.705	250.555	206.519	178.219
	87Sr/86Sr
	144Nd/143Nd
	ɛNd
	208/204Pb
	207/204Pb
	206/204Pb
	δ18O-QTZ
	δ18O-PLG
	K	14889.6	18627.8	7785.64	25654.7	29643.8	30478	24684.4	32811.1	23822.8	2620.04	24456.5	20998.5	31535.9	23978	33183
	Ti	7205.63	7646.08	1726.92	6377.18	5918.08	5898.24	6491.45	6305.6	7137.05	2066.84	7059.65	7615.09	6394.21	6380	4252.31
	P	864.774	1015.94	293.815	1137.12	1168.41	1178.84	1119.66	1328.6	1244.12	284.869	1242.16	1219.86	1246.3	1114.78	837.544
